# Supplementary material for: Construction and evaluation of an iron delivery system by ultra-small nanoparticles from roast sturgeon (Acipenser schrenckiid)
Source: Royal Society of Chemistry journal article supplement (doi:10.1039/d0fo02746d), 2020-12-16
Supplement: d0fo02746d1.pdf [file d0fo02746d1.pdf]

## Supporting information

### Construction and Evaluation of Iron Delivery System by Ultra-small Nanoparticles from Roast Sturgeon (*Acipenser schrenckii*)

Yukun Song<sup>abc</sup>, Kangjing Liu<sup>abc</sup>, Wentao Su<sup>abc</sup> Shuai Hou<sup>abc</sup> Tongtong Che<sup>abc</sup> and Mingqian Tan<sup>abc\*</sup>

*<sup>a</sup>School of Food Science and Technology, Dalian Polytechnic University, Dalian 116034, Liaoning, People's Republic of China*

*<sup>b</sup>National Engineering Research Center of Seafood, Dalian 116034, Liaoning, People's Republic of China*

*<sup>c</sup>Engineering Research Center of Seafood of Ministry of Education of China, Dalian 116034, Liaoning, People's Republic of China*

*\*Corresponding authors. Mingqian Tan, Tel: +86-411-86318657, E-mail: [mqtan@dlpu.edu.cn](mailto:mqtan@dlpu.edu.cn) ORCID: 0000-0002-7535-0035*

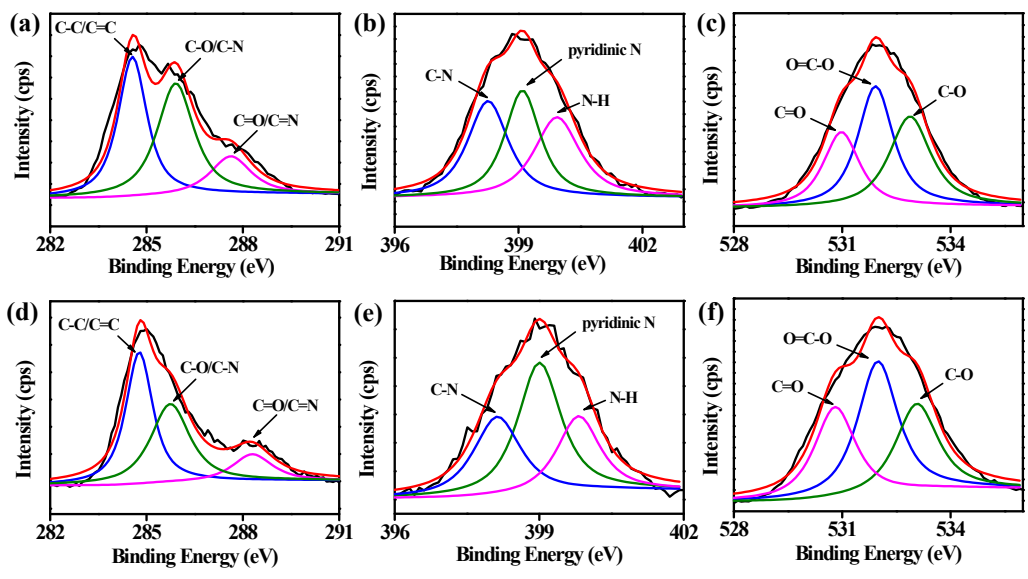

**Fig. S1** High-resolution C<sub>1s</sub> (a) N<sub>1s</sub> (b) and O<sub>1s</sub> (c) XPS spectra of FNs, and high-resolution C<sub>1s</sub> (d) N<sub>1s</sub> (e) and O<sub>1s</sub> (f) XPS spectra of FN-Fe(II).

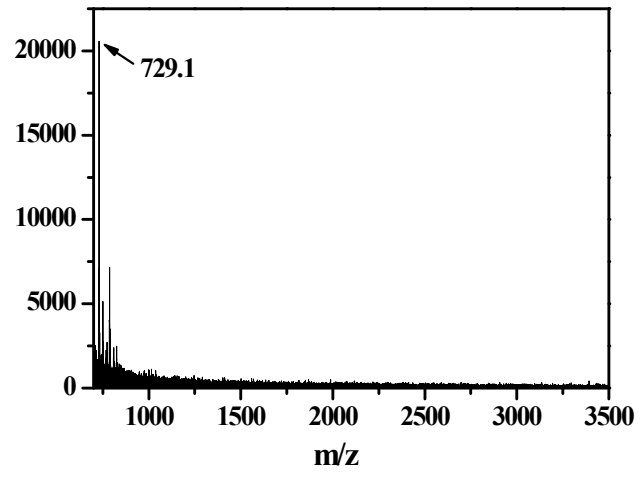

**Fig. S2** MALDI-TOF-MS spectrum of FNs extracted from roasted sturgeon.

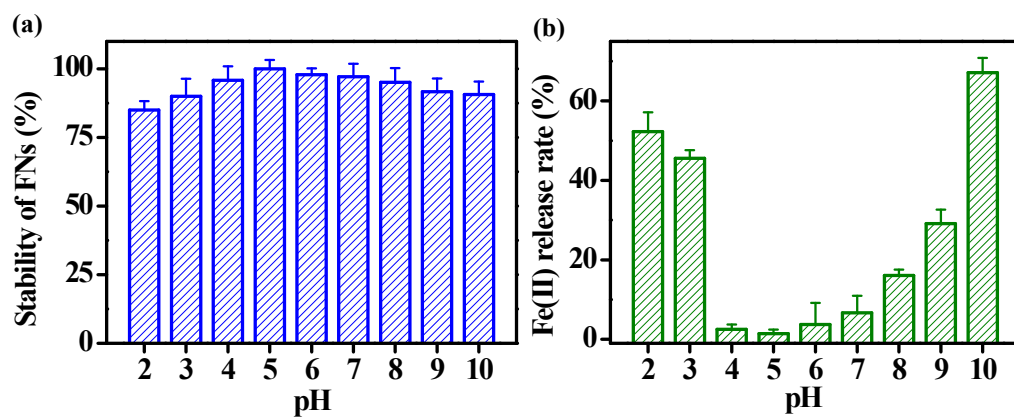

**Fig. S3** The stability of FNs (a) and Fe(II) release rate of FN-Fe(II) (b) in different pH solution.
